# Supplementary material
Source: PubMed Central journal article supplement (PMC2962617)
Supplement: NIHMS232627-supplement-supplement_1.pdf [file NIHMS232627-supplement-supplement_1.pdf]

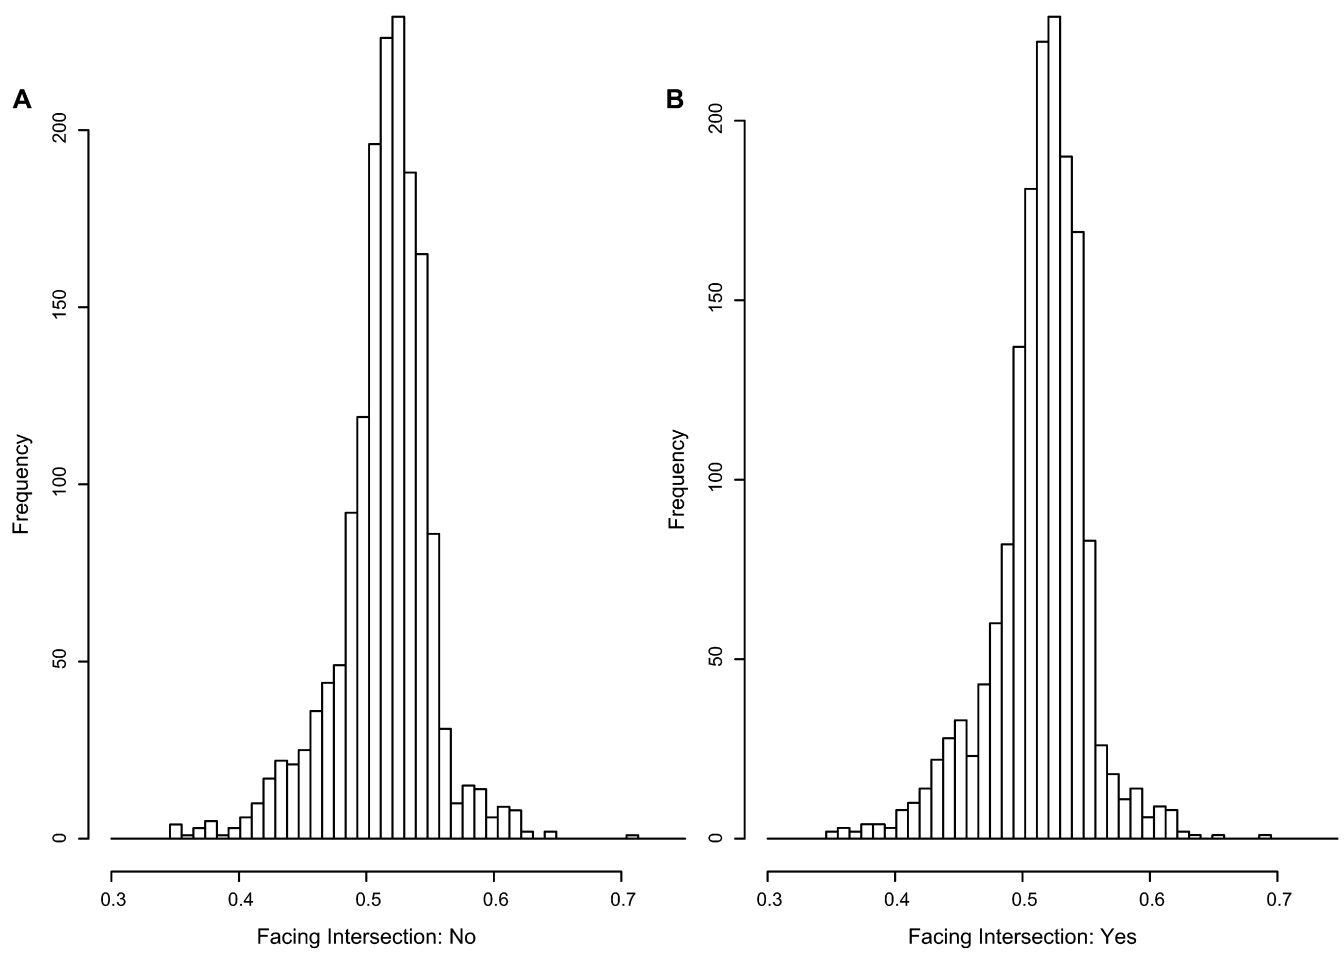

**FIG E1.** Propensity score overlapping for matching between children who lived in census tracts facing an intersection and those who lived in census tracts not facing an intersection using a caliper approach.

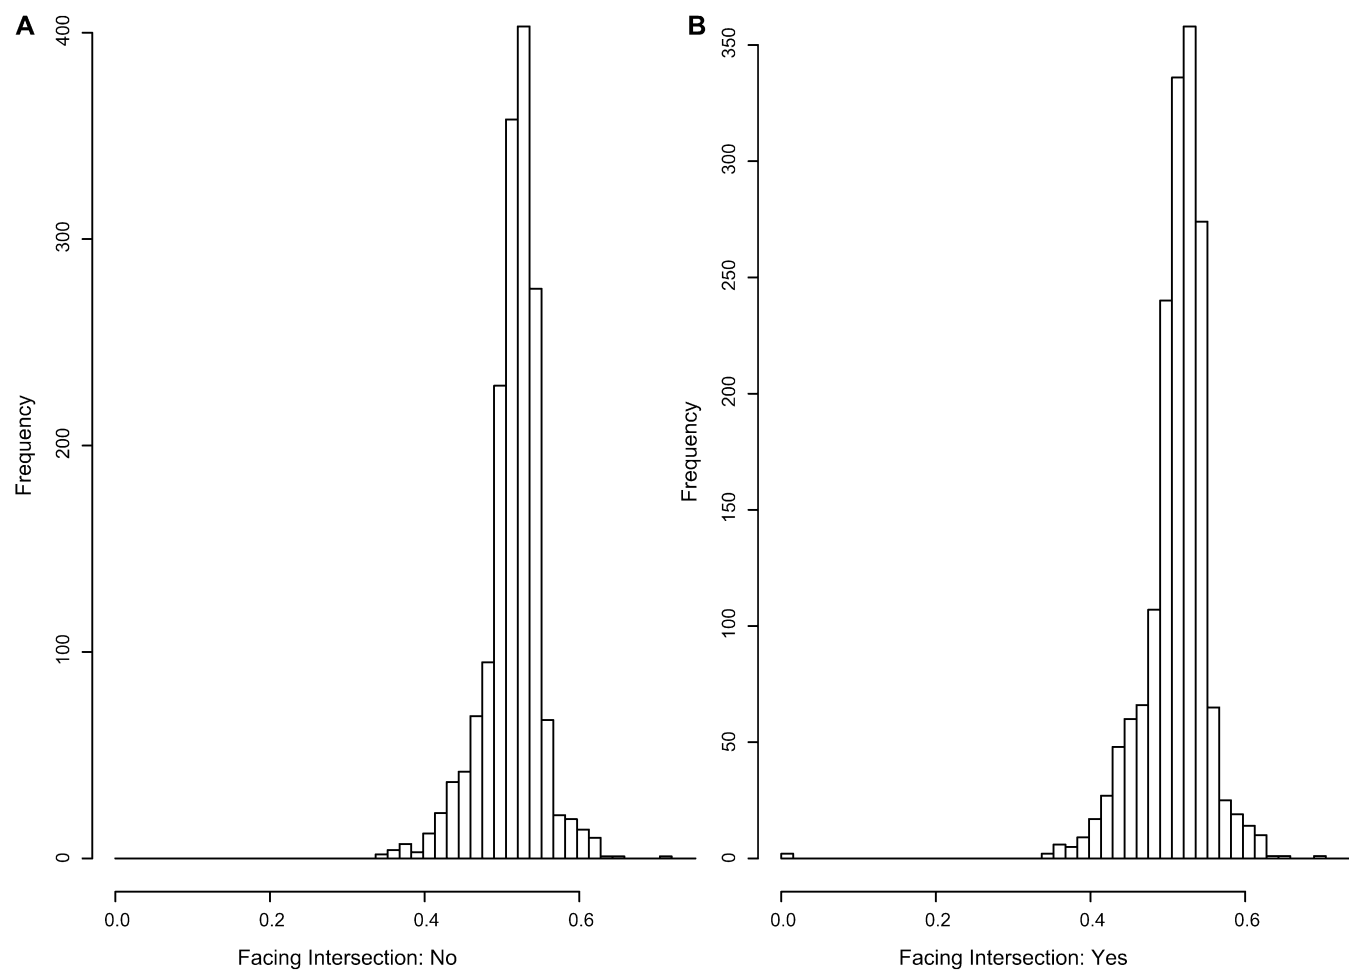

**FIG E2.** Propensity score overlapping for matching between children who lived in census tracts facing an intersection and those who lived in census tracts not facing an intersection using a nearest available matching approach.
